# Supplementary material for: Time trends in healthy lifestyle among adults in Germany: Results from three national health interview and examination surveys between 1990 and 2011
Source: PubMed Central journal article supplement (PMC6733449; doi:10.1371/journal.pone.0222218), 2019-09-09
Supplement: pone.0222218.s002.pdf [file pone.0222218.s002.pdf]

# 1 Supporting Information

2 **S1 Table: Proportions (% , 95%-CI) of individual healthy behavior factors among men aged 25-69 years according**  
 3 **to age**

|                                                       |       | 1990-92          | 1997-99          | 2008-11          | Relative change<br>1990-92 to<br>2008-11 | p <sup>#</sup> |
|-------------------------------------------------------|-------|------------------|------------------|------------------|------------------------------------------|----------------|
| <b>Men</b>                                            |       |                  |                  |                  |                                          |                |
|                                                       |       | % (95% CI)       | % (95% CI)       | % (95% CI)       | %                                        |                |
| <b>Sufficient physical exercise</b> <sup>1</sup>      |       | 18.5 (16.6-20.5) | 20.8 (18.8-23.0) | 26.8 (24.5-29.2) | 44.9                                     | <.0001         |
| Age                                                   | 25-34 | 28.1 (25.4-31.0) | 27.9 (24.1-32.0) | 36.0 (30.3-42.0) | 28.1                                     | 0.04           |
|                                                       | 35-44 | 18.2 (15.4-21.5) | 19.5 (16.4-23.1) | 26.8 (22.1-32.1) | 47.3                                     | 0.007          |
|                                                       | 45-54 | 16.6 (13.5-20.2) | 20.5 (16.8-24.7) | 22.1 (18.6-26.0) | 33.1                                     | 0.09           |
|                                                       | 55-69 | 13.6 (11.1-16.7) | 17.3 (14.0-21.3) | 24.9 (21.1-29.0) | 83.1                                     | <.0001         |
| <b>No current risk drinking</b> <sup>2</sup>          |       | 46.6 (44.0-49.1) | 76.6 (74.5-78.5) | 76.8 (74.5-78.9) | 64.8                                     | <.0001         |
| Age                                                   | 25-34 | 53.5 (49.8-57.1) | 72.9 (68.7-76.7) | 85.8 (80.9-89.6) | 60.4                                     | <.0001         |
|                                                       | 35-44 | 40.6 (36.7-44.6) | 76.6 (73.2-79.8) | 76.7 (71.5-81.2) | 88.9                                     | <.0001         |
|                                                       | 45-54 | 46.6 (42.8-50.5) | 74.9 (70.7-78.7) | 71.5 (66.9-75.7) | 53.4                                     | <.0001         |
|                                                       | 55-69 | 46.6 (42.5-50.7) | 80.7 (77.7-83.4) | 75.5 (71.7-79.0) | 62.0                                     | <.0001         |
| <b>Daily fruits and daily vegetables</b> <sup>3</sup> |       | 32.1 (30.3-34.0) | 30.8 (28.7-33.0) | 19.7 (17.6-22.1) | -38.6                                    | <.0001         |
| Age                                                   | 25-34 | 21.4 (18.4-24.8) | 20.9 (17.5-24.7) | 11.3 (7.5-16.7)  | -47.2                                    | 0.008          |
|                                                       | 35-44 | 28.3 (24.8-32.0) | 26.6 (22.9-30.5) | 19.0 (14.7-24.3) | -32.9                                    | 0.02           |
|                                                       | 45-54 | 35.3 (31.7-39.0) | 33.6 (29.8-37.6) | 19.6 (15.6-24.3) | -44.5                                    | <.0001         |
|                                                       | 55-69 | 40.0 (36.5-43.6) | 38.8 (35.0-42.8) | 26.5 (22.4-31.0) | -33.8                                    | <.0001         |
| <b>No current smoking</b> <sup>4</sup>                |       | 61.5 (59.4-63.6) | 62.3 (59.7-64.9) | 65.9 (63.0-68.7) | 7.2                                      | 0.04           |
| Age                                                   | 25-34 | 51.8 (48.3-55.3) | 51.0 (46.0-56.0) | 49.7 (43.6-55.8) | -4.1                                     | 0.85           |
|                                                       | 35-44 | 53.7 (49.5-57.8) | 52.0 (47.1-56.9) | 63.3 (57.8-68.5) | 17.9                                     | 0.003          |
|                                                       | 45-54 | 65.5 (61.9-68.8) | 63.1 (58.6-67.3) | 64.3 (58.7-69.5) | -1.8                                     | 0.70           |
|                                                       | 55-69 | 71.3 (67.6-74.7) | 78.3 (74.7-81.4) | 81.1 (77.9-84.0) | 13.7                                     | 0.0001         |
| <b>Normal weight</b> <sup>5</sup>                     |       | 29.9 (28.0-32.0) | 27.1 (25.0-29.4) | 28.7 (26.4-31.1) | -4.0                                     | 0.18           |
| Age                                                   | 25-34 | 51.0 (47.0-54.9) | 43.5 (39.0-48.1) | 46.8 (40.8-52.9) | -8.2                                     | 0.06           |
|                                                       | 35-44 | 32.0 (28.3-36.0) | 31.0 (26.8-35.6) | 31.8 (27.1-37.0) | -0.6                                     | 0.94           |
|                                                       | 45-54 | 24.3 (21.1-27.8) | 22.5 (18.8-26.5) | 23.2 (19.3-27.6) | -4.5                                     | 0.77           |
|                                                       | 55-69 | 18.6 (15.9-21.7) | 16.8 (14.2-19.8) | 18.5 (15.8-21.6) | -0.5                                     | 0.61           |

4 # p for trend

5 \* Prevalences are standardized to the German population as of 31 December 2010.

6 <sup>1</sup> Sufficient physical exercise: physical exercise  $\geq 2$ h/week; <sup>2</sup> No current risk drinking: men  $\leq 20$ g/day; women  $\leq 10$ g/day; <sup>3</sup>  
 7 Consumption of fruits and vegetables once or more a day vs. less than daily; <sup>4</sup> No current smoking (never and ex-smoking); <sup>5</sup>  
 8 Normal weight: BMI 18.5- $<25.0$  kg/m<sup>2</sup>.

9
