# Supplementary material for: Time trends in healthy lifestyle among adults in Germany: Results from three national health interview and examination surveys between 1990 and 2011
Source: PubMed Central journal article supplement (PMC6733449; doi:10.1371/journal.pone.0222218), 2019-09-09
Supplement: pone.0222218.s003.pdf [file pone.0222218.s003.pdf]

# 1 Supporting Information

2 **S2 Table: Proportions (% , 95%-CI) of individual healthy behavior factors among women aged 25-69 years**  
 3 **according to age**

|                                                      |       | 1990-92          | 1997-99          | 2008-11          | Relative change<br>1990-92 to<br>2008-11 | p <sup>#</sup> |
|------------------------------------------------------|-------|------------------|------------------|------------------|------------------------------------------|----------------|
| <b>Women</b>                                         |       |                  |                  |                  |                                          |                |
|                                                      |       | % (95% CI)       | % (95% CI)       | % (95% CI)       | %                                        |                |
| <b>Sufficient physical exercise<sup>1</sup></b>      |       | 9.9 (8.5-11.4)   | 14.9 (13.3-16.6) | 21.6 (19.7-23.5) | 118.2                                    | <.0001         |
| Age                                                  | 25-34 | 13.6 (11.2-16.5) | 16.2 (13.4-19.6) | 19.9 (16.0-24.6) | 46.3                                     | 0.04           |
|                                                      | 35-44 | 10.7 (8.0-14.3)  | 15.6 (12.8-18.9) | 19.0 (15.6-22.9) | 77.6                                     | 0.006          |
|                                                      | 45-54 | 10.6 (8.4-13.2)  | 15.4 (12.5-18.8) | 21.0 (17.8-24.5) | 98.1                                     | <.0001         |
|                                                      | 55-69 | 6.1 (4.5-8.1)    | 13.0 (10.6-15.8) | 25.3 (21.5-29.5) | 314.8                                    | <.0001         |
| <b>No current risk drinking<sup>2</sup></b>          |       | 49.3 (47.1-51.4) | 71.2 (69.2-73.2) | 75.5 (73.1-77.8) | 53.1                                     | <.0001         |
| Age                                                  | 25-34 | 47.1 (43.4-50.9) | 71.4 (67.2-75.2) | 88.9 (84.2-92.4) | 88.7                                     | <.0001         |
|                                                      | 35-44 | 44.9 (40.6-49.4) | 72.6 (68.3-76.4) | 77.1 (72.5-81.0) | 71.7                                     | <.0001         |
|                                                      | 45-54 | 46.4 (42.5-50.3) | 70.9 (66.7-74.8) | 68.6 (63.8-73.0) | 47.8                                     | <.0001         |
|                                                      | 55-69 | 56.5 (53.1-59.9) | 70.4 (66.5-74.0) | 71.5 (67.4-75.2) | 26.5                                     | <.0001         |
| <b>Daily fruits and daily vegetables<sup>3</sup></b> |       | 53.7 (51.6-55.8) | 51.9 (49.4-54.4) | 38.0 (35.4-40.6) | -29.2                                    | <.0001         |
| Age                                                  | 25-34 | 45.5 (41.8-49.2) | 40.7 (35.9-45.7) | 29.1 (23.9-34.9) | -36.0                                    | <.0001         |
|                                                      | 35-44 | 50.8 (46.6-54.9) | 51.1 (46.9-55.3) | 36.5 (31.4-41.9) | -28.1                                    | <.0001         |
|                                                      | 45-54 | 53.5 (49.7-57.3) | 53.8 (48.8-58.7) | 40.1 (35.8-44.5) | -25.0                                    | <.0001         |
|                                                      | 55-69 | 61.5 (58.0-65.0) | 58.1 (53.6-62.4) | 43.2 (39.2-47.3) | -29.8                                    | <.0001         |
| <b>No current smoking<sup>4</sup></b>                |       | 73.6 (71.7-75.4) | 71.5 (69.3-73.6) | 70.4 (67.9-72.7) | -4.3                                     | 0.10           |
| Age                                                  | 25-34 | 57.1 (53.7-60.5) | 57.2 (52.3-61.9) | 60.0 (54.0-65.8) | 5.1                                      | 0.69           |
|                                                      | 35-44 | 64.6 (60.5-68.6) | 62.5 (58.1-66.6) | 69.1 (63.7-74.1) | 7.3                                      | 0.17           |
|                                                      | 45-54 | 78.6 (75.4-81.5) | 74.5 (70.4-78.2) | 68.6 (64.4-72.6) | -12.7                                    | 0.0007         |
|                                                      | 55-69 | 87.0 (84.5-89.2) | 85.0 (82.2-87.4) | 79.9 (75.9-83.4) | -8.2                                     | 0.003          |
| <b>Normal weight<sup>5</sup></b>                     |       | 44.2 (41.9-46.5) | 43.6 (41.0-46.2) | 46.9 (44.4-49.4) | 6.1                                      | 0.09           |
| Age                                                  | 25-34 | 65.8 (62.8-68.8) | 63.9 (60.3-67.4) | 63.0 (56.8-68.7) | -4.3                                     | 0.59           |
|                                                      | 35-44 | 55.0 (51.1-58.9) | 54.5 (49.4-59.5) | 53.2 (48.1-58.1) | -3.3                                     | 0.84           |
|                                                      | 45-54 | 39.3 (35.5-43.2) | 39.0 (34.0-44.3) | 45.0 (40.9-49.2) | 14.5                                     | 0.08           |
|                                                      | 55-69 | 25.9 (22.5-29.7) | 26.1 (22.8-29.8) | 32.7 (29.1-36.6) | 26.3                                     | 0.007          |

4 # p for trend

5 \* Prevalences are standardized to the German population as of 31 December 2010.

6 <sup>1</sup> Sufficient physical exercise: physical exercise  $\geq 2$ h/week; <sup>2</sup> No current risk drinking: men  $\leq 20$ g/day; women  $\leq 10$ g/day; <sup>3</sup>

7 Consumption of fruits and vegetables once or more a day vs. less than daily; <sup>4</sup> No current smoking (never and ex-smoking); <sup>5</sup>

8 Normal weight: BMI 18.5-<25.0 kg/m<sup>2</sup>.
